# Supplementary material for: Dried Porous Biomaterials from Mealworm Protein Gels: Proof of Concept and Impact of Drying Method on Structural Properties and Zinc Retention
Source: MDPI journal article supplement (doi:10.3390/gels10040275), 2024-04-18
Supplement: s1 [file s1]

# Dried porous biomaterials from mealworm protein gels: Proof of concept and impact of drying method on structural properties and zinc retention

Martina Klost <sup>1</sup> (<https://orcid.org/0000-0001-7131-6406>), Claudia Keil <sup>2</sup> (<https://orcid.org/0000-0003-0317-0905>) and Pavel Gurikov <sup>3,4\*</sup> (<https://orcid.org/0000-0003-0598-243X>)

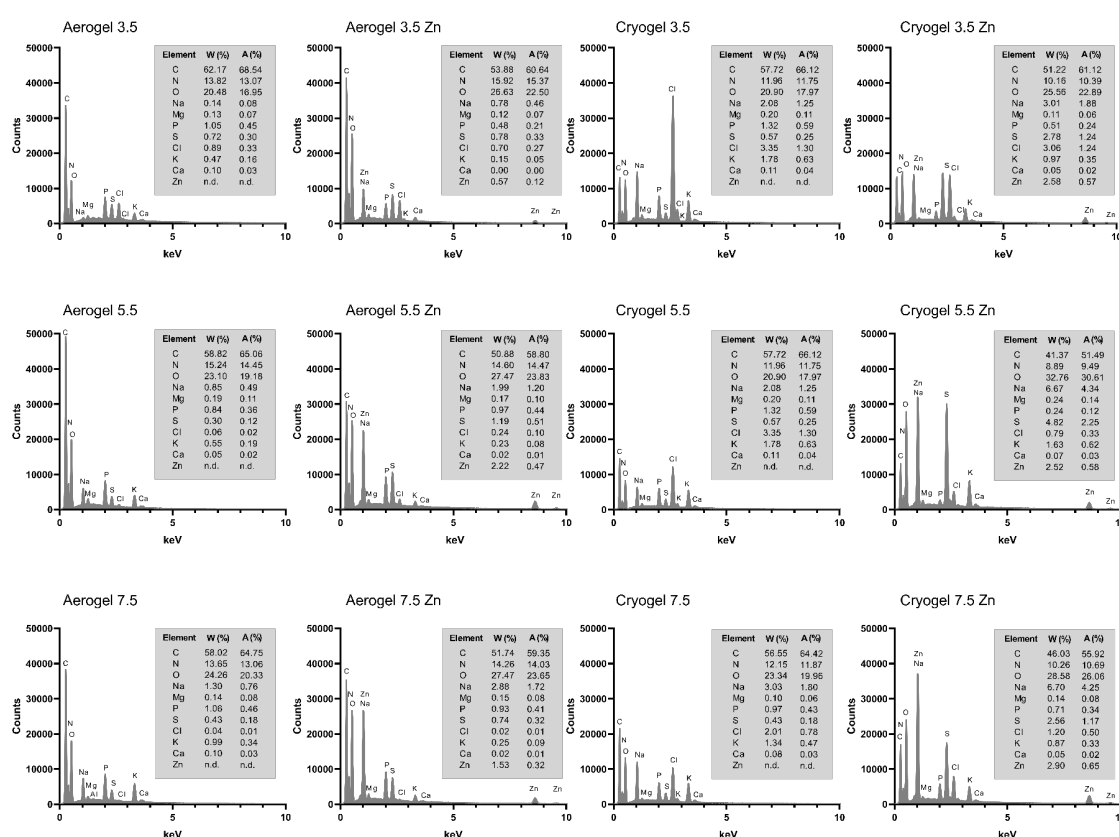

**Figure S1.** EDX spectra of all samples prepared with and without 0.3 M ZnSO<sub>4</sub>. The inset table shows results of semi-quantitative standardless EDX analysis.

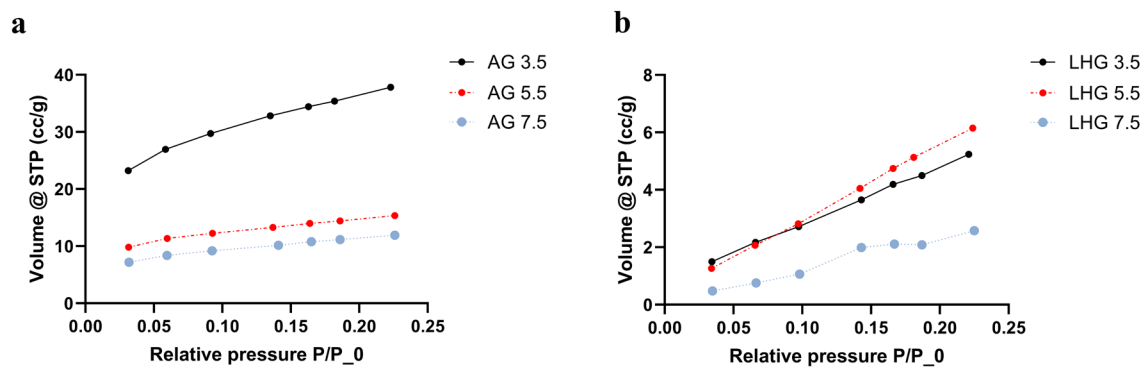

**Figure S2.** Nitrogen adsorption isotherms of AG (a) and LHG (b) at pH 3.5, 5.5 and 7.5 respectively.
